# Supplementary material for: Comparative targeting analysis of KLF1, BCL11A, and HBG1/2 in CD34+ HSPCs by CRISPR/Cas9 for the induction of fetal hemoglobin
Source: PubMed Central journal article supplement (PMC7311455; doi:10.1038/s41598-020-66309-x), 2020-06-23
Supplement: 41598_2020_66309_MOESM1_ESM.pdf [file 41598_2020_66309_MOESM1_ESM.pdf]

## SUPPLEMENTARY FIGURES AND TABLES

### **Comparative targeting analysis of *KLF1*, *BCL11A*, and *HBG1/2* in CD34<sup>+</sup> HSPCs by CRISPR/Cas9 for the induction of fetal hemoglobin**

Andrés Lamsfus-Calle<sup>1</sup> \*, Alberto Daniel-Moreno<sup>1</sup> \*, Justin S Antony<sup>1</sup>, Thomas Epting<sup>2</sup>, Lukas Heumos<sup>3</sup>, Praveen Baskaran<sup>3</sup>, Jakob Admar<sup>4</sup>, Nicolas Casadei<sup>4</sup>, Ngadhujim Latifi<sup>5</sup>, Darina M. Siegmund<sup>6</sup>, Michael S.D. Kormann<sup>7</sup>, Rupert Handgretinger<sup>1</sup>, and Markus Mezger<sup>1\*</sup>

# SUPPLEMENTARY FIGURES

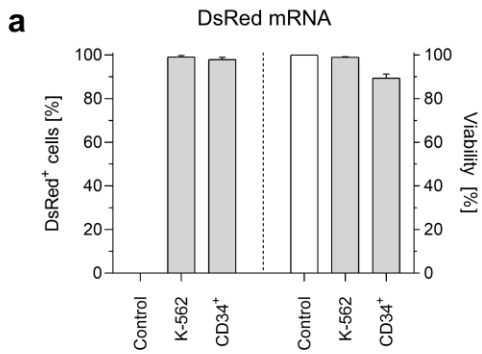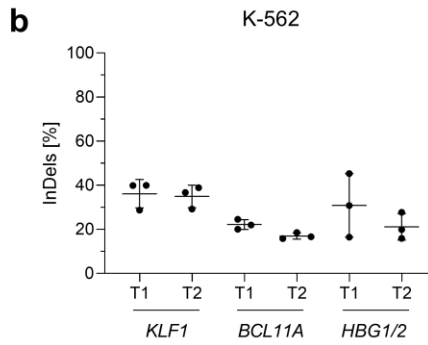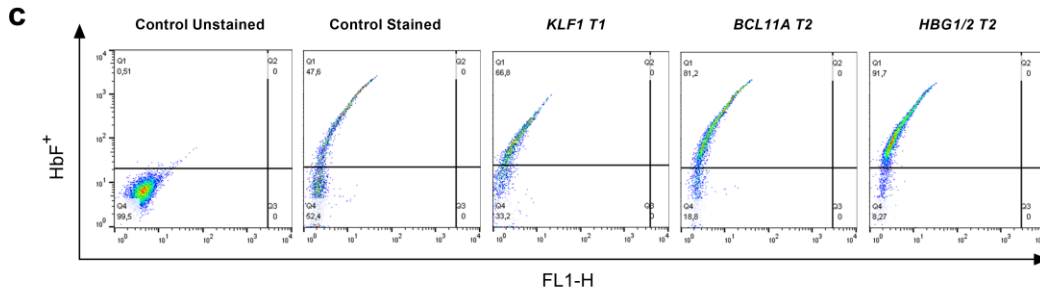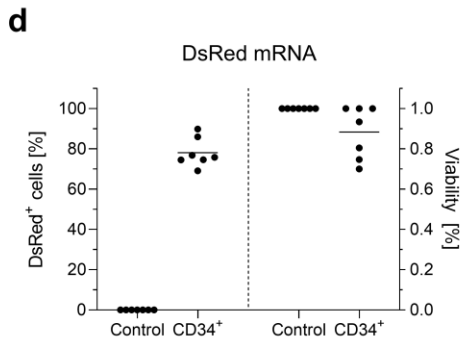

**e**

| Sample | InDel [nt] | Wt sequence:             | InDel [%] |
|--------|------------|--------------------------|-----------|
|        |            | CCTTGCCTTGA CCAATAGCCTTG |           |
| 1      | -13        | CCTTGCCT--- -----TG      | 50.6      |
|        | -2         | CCTTGCCTTGA --AATAGCCTTG | 8.2       |
|        | -1         | CCTTGCCTTGA -CAATAGCCTTG | 6.4       |
| 2      | -13        | CCTTGCCT--- -----TG      | 42.2      |
|        | -2         | CCTTGCCTTGA --AATAGCCTTG | 9.5       |
|        | -3         | CCTTGCCTTGA ---ATAGCCTTG | 7.3       |
| 3      | -13        | CCTTGC--- -----TTG       | 38.3      |
|        | -1         | CCTTGCCTTGA -CAATAGCCTTG | 3.4       |
|        | -3         | CCTTGCCTTG- --AATAGCCTTG | 3.1       |
|        |            | ...                      | ...       |

**Figure S1. Gene editing in K-562 and human CD34<sup>+</sup> HSPCs using Neon Transfection System and CliniMACS Prodigy.** (a) Transfection efficiency and viability for K-562 and CD34<sup>+</sup> utilizing the Neon Transfection System and DsRed reporter mRNA. (b) Indel rates measured by T7E1-assay in K-562 cells after electroporation of recombinant pX-330 for each sgRNA. (c) Representative intracellular staining dot-plots showing HbF<sup>+</sup> CD34<sup>+</sup> HSPCs on day 21 for the most efficient treatments. (d) DsRed mRNA transfection into human CD34<sup>+</sup> HSPCs using the CliniMACS Prodigy with respective cell viability. (e) Representation of the 13-nt deletion detected by ICE analysis after *HBG1/2* T2 gene editing. The rectangle indicates the binding site for BCL11A which is disrupted in all gene-edited samples compared to the wild-type (wt) control sequence. Underlined are represented short homology sequences involved in MMEJ-based repair.

## SUPPLEMENTARY TABLES

**Table S1.** Target sequences, oligonucleotides utilized for cloning into pX-330 vector, sgRNAs, and respective references for all studied genes.

| Gene          | Target | Target strand (5'-3')     | Oligonucleotides (5'-3')                                          | sgRNA (5'-3')         | Reference |
|---------------|--------|---------------------------|-------------------------------------------------------------------|-----------------------|-----------|
| <b>KLF1</b>   | 1      | CCT CTTGCGCGCCACGAACGTC   | For: AAAC-CTTGC GCGCCACGAACGTC<br>Rev: CACC-GACGTTCTG TGGCGCGCAAG | GACGTTCTG TGGCGCGCAAG | 17        |
|               | 2      | CCG AGCGCGCGAATCTCCAGCCG  | For: AAAC-AGCGCGCGAATCTCCAGCCG<br>Rev: CACC-CGGCTGGAGATTCGCGCGCT  | CGGCTGGAGATTCGCGCGCT  | 17        |
| <b>BCL11A</b> | 1      | CCT GGAGCCTGTGATAAAAGCAA  | For: AAAC-GGAGCCTGTGATAAAAGCAA<br>Rev: CACC-TTGCTTTTATCACAGGCTCC  | TTGCTTTTATCACAGGCTCC  | 43        |
|               | 2      | CCT GTGATAAAAGCAACTGTTAG  | For: AAAC-GTGATAAAAGCAACTGTTAG<br>Rev: CACC-CTTGACCAATAGCCTTGACA  | CTAACAGTTGCTTTTATCAC  | 43        |
| <b>HBG1/2</b> | 1      | CCT TGTC AAGGCTATTGGTCAAG | For: AAAC-TGTC AAGGCTATTGGTCAAG<br>Rev: CACC-CTTGACCAATAGCCTTGACA | CTTGACCAATAGCCTTGACA  | 14        |
|               | 2      | CCT TGACCAATAGCCTTGACAAG  | For: AAAC-TGACCAATAGCCTTGACAAG<br>Rev: CACC-CTTGTC AAGGCTATTGGTCA | CTTGTCAAGGCTATTGGTCA  | 14        |
| <b>BetaPr</b> | 1      | CCT TGGCTCTTCTGGCACTGGCT  | -                                                                 | AGCCAGTGCCAGAAGAGCCA  | 55        |

**Table S2.** Oligonucleotide sequences utilized for PCR, qRT-PCR, and ddPCR.

| Gene                              | qRT-PCR / PCR / ddPCR | Target    | For/Rev              | Primer Sequence           | Reference  |
|-----------------------------------|-----------------------|-----------|----------------------|---------------------------|------------|
| <b><math>\alpha</math>-globin</b> | qRT-PCR               | -         | For                  | CTGGCGAGTATGGTGCG         | 56         |
|                                   |                       |           | Rev                  | GAAGTGC GGG AAGTAGGTC     | 56         |
| <b><math>\beta</math>-globin</b>  | qRT-PCR               | -         | For                  | TGCACGTGGATCCTGAGAACT     | 56         |
|                                   |                       |           | Rev                  | AATTCTTTGCCAAAGTGATGGG    | 56         |
| <b><math>\gamma</math>-globin</b> | qRT-PCR               | -         | For                  | TGGCAAGAAGGTGCTGACTTC     | 57         |
|                                   |                       |           | Rev                  | TCACTCAGCTGGGCAAAGG       | 57         |
| <b>B2M</b>                        | qRT-PCR               | -         | For                  | GATGAGTATGCCTGCCGTGT      | 58         |
|                                   |                       |           | Rev                  | AATTCATCCAATCCAATGAG      | 58         |
|                                   | ddPCR                 | Intron 1  | For                  | TGGCTGTGATACAAAGCGGT      | Own design |
|                                   |                       |           | Rev                  | GGAAACAACCAGGCAAGAG       | Own design |
|                                   |                       | HEX probe | GATGAAGAACTAAGGCACCG | Own design                |            |
| <b>KLF1</b>                       | PCR                   | 1         | For                  | AAGGGCACTCCAGCTCTTC       | Own design |
|                                   |                       |           | Rev                  | GTGGTCAGAGCGCGAAAAAG      | Own design |
|                                   |                       | 2         | For                  | TCCTTCTGAGTTGTTGG         | 17         |
|                                   |                       |           | Rev                  | GATGTCCAAACTGTCGTGCAA     | Own design |
|                                   | qRT-PCR               | -         | For                  | CACACAGGGGAGAAGCCATA      | 17         |
|                                   |                       |           | Rev                  | GTCAGAGCGCGAAAAAGC        |            |
| <b>BCL11A</b>                     | PCR<br>qRT-PCR        | 1         | For                  | GTGTATGTGCTGATTGAGGGC     | Own design |
|                                   |                       |           | Rev                  | GGACAGCCCGACAGATGAAA      | Own design |
|                                   |                       |           | For                  | GTGTATGTGCTGATTGAGGGC     | Own design |
|                                   |                       | 2         | Rev                  | GGACAGCCCGACAGATGAAA      | Own design |
|                                   |                       |           | For                  | AACCACTGCTAACTGAAAGAGACT  | 14         |
|                                   |                       |           | Rev                  | GGCGTCTGGACTAGGAGCTTATTG  |            |
| HBG1                              | PCR                   | HBG2      | For                  | GCACTGAACTGTTGCTTTATAGGAT |            |
|                                   |                       |           | Rev                  | GGCGTCTGGACTAGGAGCTTATTG  |            |
| ddPCR                             | Intergenic region     | For       | TTCAGTGAAGGGGGCTGAAC | Own design                |            |
|                                   |                       | Rev       | ATGACACGCTGATGCTGACT | Own design                |            |
|                                   |                       | FAM probe | ACAGGGAGGTTGAGGTGTTA | Own design                |            |

**Table S3.** *In silico* off-target predictions utilizing online tool CHOPCHOP.<sup>59</sup>

| Gene          | Target | Target sequence           | off-targets <i>in silico</i> |
|---------------|--------|---------------------------|------------------------------|
| <b>KLF1</b>   | 1      | GACGTTCTG TGGCGCGCAAG AGG | 0                            |
| <b>KLF1</b>   | 2      | CGGCTGGAGATTCGCGCGCT CGG  | 0                            |
| <b>BCL11A</b> | 1      | TTGCTTTTATCACAGGCTCC AGG  | n/d                          |
| <b>BCL11A</b> | 2      | CTAACAGTTGCTTTTATCAC AGG  | n/d                          |
| <b>HBG1/2</b> | 1      | CTTGACCAATAGCCTTGACA AGG  | 5                            |
| <b>HBG1/2</b> | 2      | CTTGTCAAGGCTATTGGTCA AGG  | 2                            |
| <b>BetaPr</b> | -      | AGCCAGTGCCAGAAGAGCCA AGG  | 16                           |

## References

55. Antony, J. S. et al. Gene correction of HBB mutations in CD34+ hematopoietic stem cells using Cas9 mRNA and ssODN donors. *Molecular and Cellular Pediatrics* 5, <https://doi.org/10.1186/s40348-018-0086-1> (2018).
56. Papapetrou, E. P. et al. Genomic safe harbors permit high  $\beta$ -globin transgene expression in thalassemia induced pluripotent stem cells. *Nature Biotechnology* 29, 73, <https://doi.org/10.1038/nbt.1717> (2010).
57. Nastruzzi, C. et al. Mithramycin encapsulated in polymeric micelles by microfluidic technology as novel therapeutic protocol for beta-thalassemia. *International Journal of Nanomedicine*, <https://doi.org/10.2147/ijn.S25657> (2012).
58. Ting, H. J., Bao, B. Y., Reeder, J. E., Messing, E. M. & Lee, Y. F. Increased expression of corepressors in aggressive androgen-independent prostate cancer cells results in loss of 1 $\alpha$ ,25-dihydroxyvitamin D<sub>3</sub> responsiveness. *Mol Cancer Res* 5, 967–980, <https://doi.org/10.1158/1541-7786.MCR-06-0318> (2007).
- 59 Labun, K. et al. CHOPCHOP v3: expanding the CRISPR web toolbox beyond genome editing. *Nucleic Acids Research* 47, W171-W174, doi:10.1093/nar/gkz365 (2019).
